# Supplementary material
Source: publisher figshare collection journal article supplement (https://acs.figshare.com/ndownloader/files/21781161)
Supplement: Supplementary file 1 [file 21781161]

# Electronic Supplementary Information

## Highly Inter-connected Nanorods and Nanosheets Based on Hierarchically Layered MOF for Flexible, High-Performance Energy Storage Device

Chang Soo Lee<sup>a†</sup>, Juyoung Moon<sup>b†</sup>, Jung Tae Park<sup>b\*</sup> and Jong Hak Kim<sup>a\*</sup>

<sup>a</sup> *Department of Chemical and Biomolecular Engineering, Yonsei University,*

*50 Yonsei-ro, Seodaemun-gu, Seoul 03722, Republic of Korea*

<sup>b</sup> *Department of Chemical Engineering, Konkuk University,*

*120 Neungdong-ro, Gwangjin-gu, Seoul 05029, Republic of Korea*

<sup>†</sup>*These authors contributed equally*

\*Corresponding Authors

Jung Tae Park

Tel: +82-2-450-3538, Fax: +82-2-450-3504

E-mail: jtpark25@konkuk.ac.kr

Jong Hak Kim

Tel: +82-2-2123-5757, Fax: +82-2-312-6401

E-mail: jonghak@yonsei.ac.kr

**Number of Pages: 10**

**Number of Figures: 7**

**Number of Tables: 1**

## Table of Contents

|                                                                                                                                                                   |     |
|-------------------------------------------------------------------------------------------------------------------------------------------------------------------|-----|
| 1. Demagnified SEM images of hl-MOF, u-hl-MOF and u-hl-MOF/NRSs on Ni foam .....                                                                                  | S3  |
| 2. N <sub>2</sub> sorption isotherm of u-hl-MSC/NRSs on Ni foam and bare Ni foam .....                                                                            | S4  |
| 3. EDS spectrum and calculated element ratio table of u-hl-MSC section and NRs section.....                                                                       | S5  |
| 4. TGA curves of hl-MOF, u-hl-MOF, u-hl-MOF/NRSs and NRSs (collected from the residue powder in autoclave container) under N <sub>2</sub> atmosphere.....         | S6  |
| 5. XPS spectra of survey scan and the deconvoluted spectra for specific elements of C 1s, N 1s and Ni 2p for hl-MSC, u-hl-MSC, and u-hl-MSC/NRSs on Ni foam ..... | S7  |
| 6. Peak current density curve according to scan rate from cathodic reaction and anodic reaction to calculate the b value from equation .....                      | S8  |
| 7. SEM image and XRD spectrum of u-hl-MSCs electrode after 10000 cycles.....                                                                                      | S9  |
| 8. Surface atomic percent (%) component determined from X-ray photoelectron spectroscopy .....                                                                    | S10 |

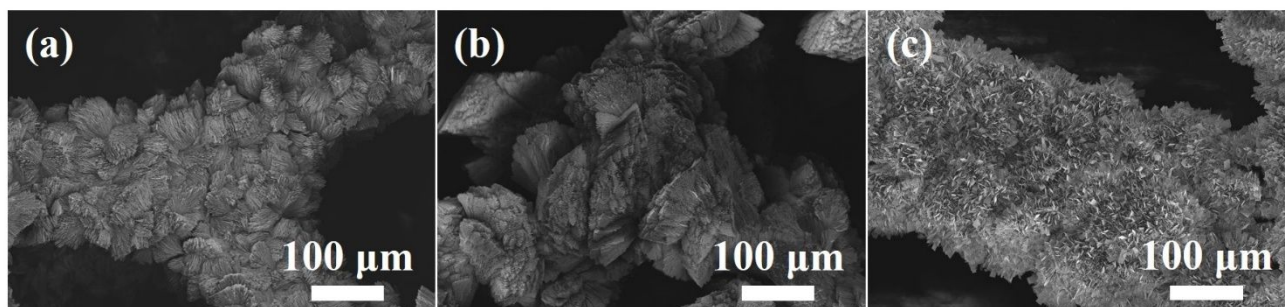

**Figure S1.** Demagnified SEM images of (a) hl-MOF, (b) u-hl-MOF and (c) u-hl-MOF/NRSs on Ni foam.

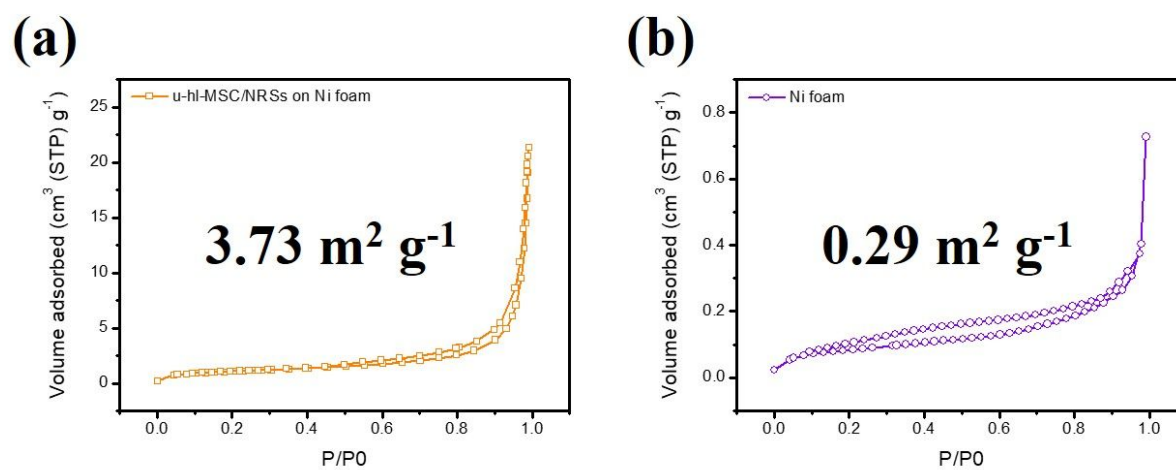

**Figure S2.**  $\text{N}_2$  sorption isotherm of (a) u-hl-MSC/NRSs on Ni foam and (b) bare Ni foam.

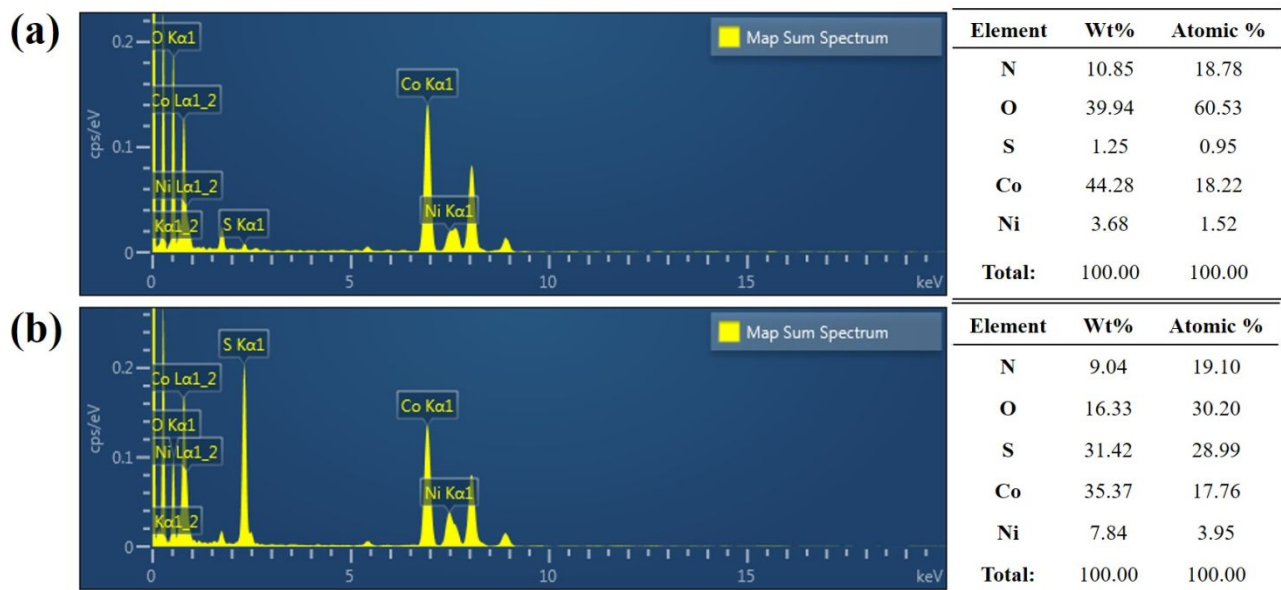

**Figure S3.** EDS spectrum and calculated element ratio table of (a) u-hl-MSC section and (b) NRs section.

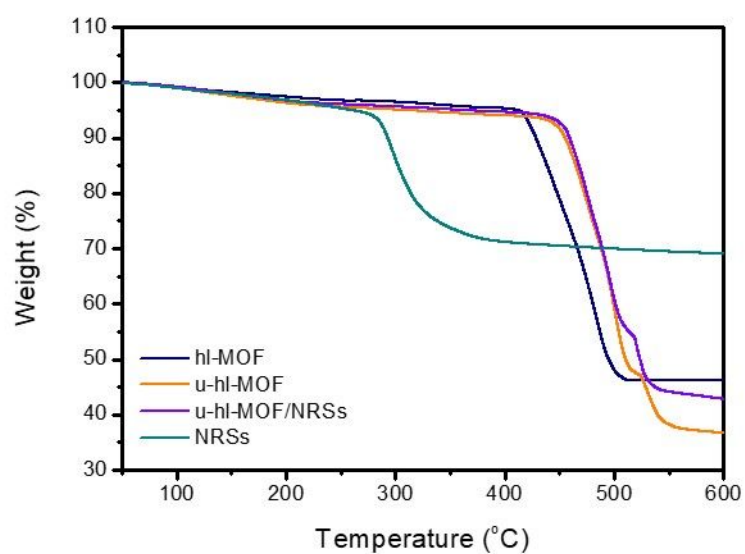

**Figure S4.** TGA curves of hl-MOF, u-hl-MOF, u-hl-MOF/NRSs and NRSs (collected from the residue powder in autoclave container) under N<sub>2</sub> atmosphere.

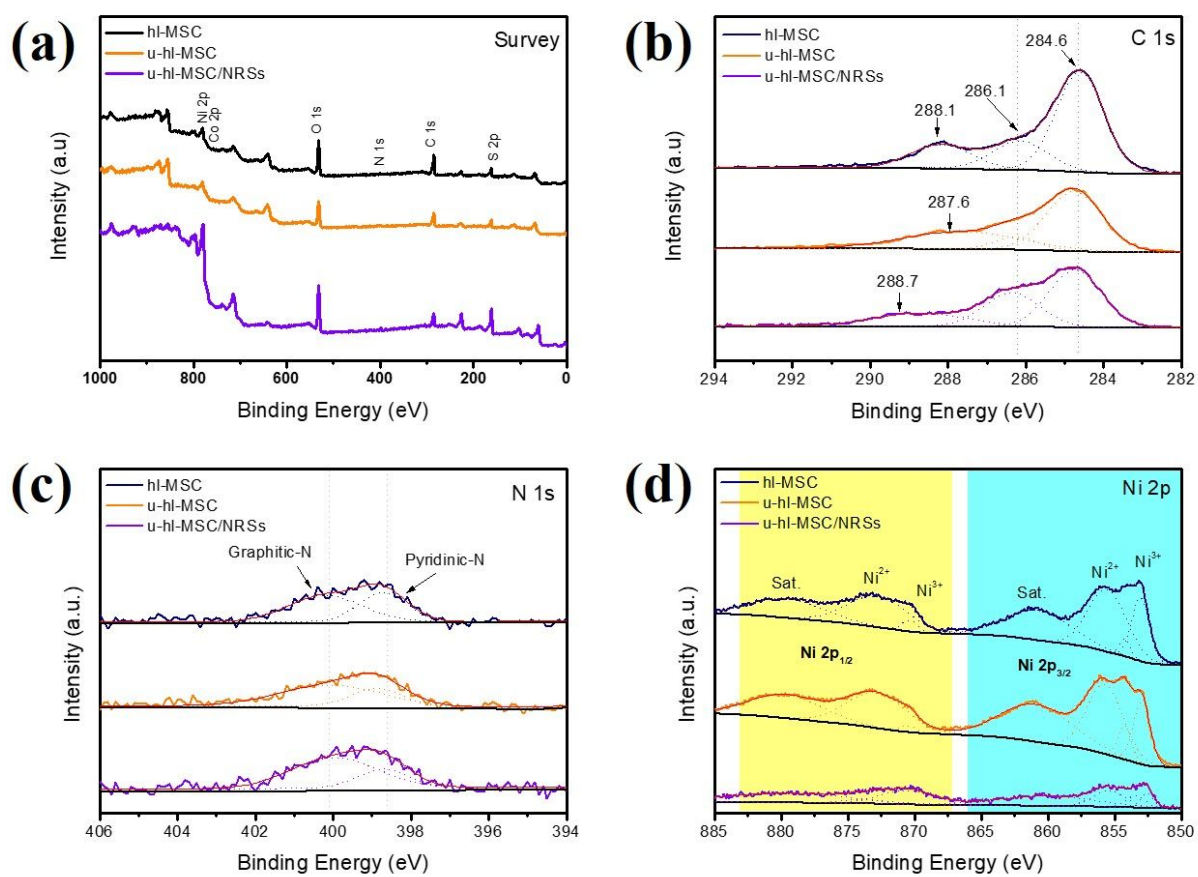

**Figure S5.** XPS spectra of (a) survey scan and the deconvoluted spectra for specific elements of (b) C 1s, (c) N 1s and (d) Ni 2p for hl-MSC, u-hl-MSC, and u-hl-MSC/NRSs on Ni foam.

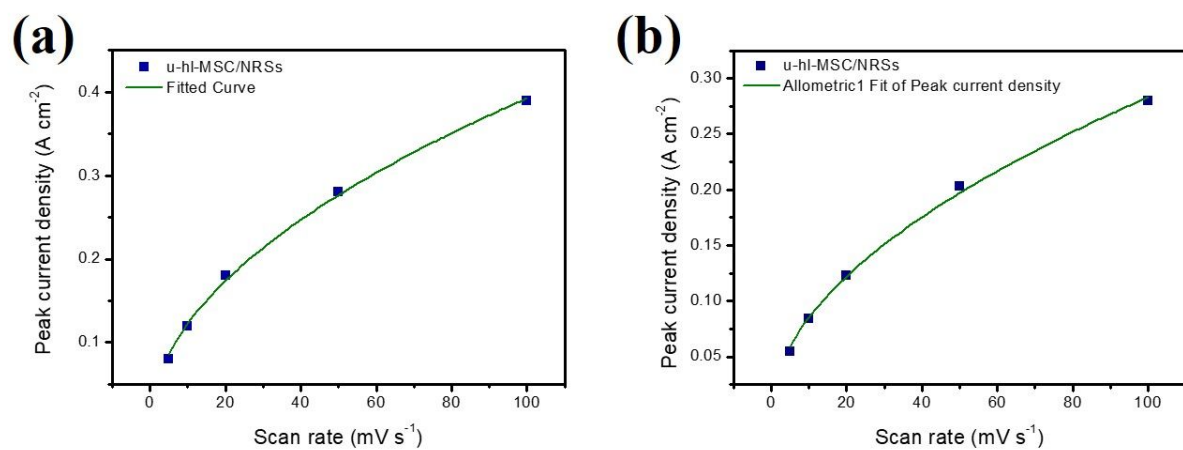

**Figure S6.** Peak current density curve according to scan rate from (a) cathodic reaction and (b) anodic reaction to calculate the  $b$  value from equation.



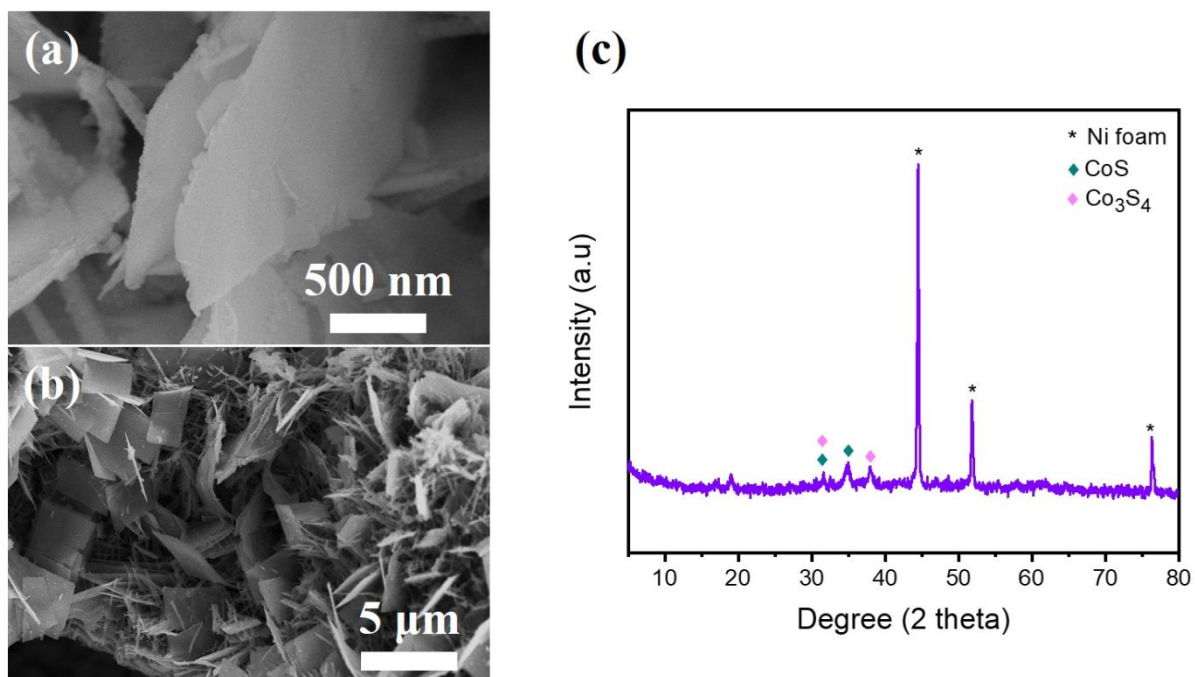

**Figure S7.** (a,b) SEM image and (c) XRD spectrum of u-hl-MSCs electrode after 10000 cycles.

**Table S1.** Surface atomic percent (%) component determined from X-ray photoelectron spectroscopy.

| Sample        | Concentration [atomic %] |       |      |       |       |       |
|---------------|--------------------------|-------|------|-------|-------|-------|
|               | C                        | Co    | N    | Ni    | O     | S     |
| hl-MSC        | 44.29                    | 4.15  | 2.21 | 10.62 | 27.89 | 10.84 |
| u-hl-MSC      | 39.47                    | 3.49  | 2.63 | 14.85 | 28.63 | 10.93 |
| u-hl-MSC/NRSs | 23.75                    | 17.91 | 1.85 | 3.31  | 29.47 | 23.7  |
